# Supplementary material for: Obvious vapochromic color changes of a pillar[6]arene containing one benzoquinone unit with a mechanochromic change before vapor exposure
Source: Royal Society of Chemistry journal article supplement (doi:10.1039/d0cc01112f), 2020-01-01
Supplement: d0cc01112f1.pdf [file d0cc01112f1.pdf]

## **Electronic Supplementary Information**

# Obvious Vapochromic Color Changes of a Pillar[6]arene Containing One Benzoquinone Unit with a Mechanochromic Change Before Vapor Exposure

*Keisuke Wada<sup>a</sup>, Takahiro Kakuta<sup>a,b</sup>, Tada-aki Yamagishi<sup>a</sup> and Tomoki Ogoshi<sup>b,c,\*</sup>*

<sup>a</sup>Graduate School of Natural Science and Technology, Kanazawa University, Kakuma-machi, Kanazawa, 920-1192, Japan

<sup>b</sup>WPI Nano Life Science Institute, Kanazawa University, Kakuma-machi, Kanazawa, 920-1192, Japan

<sup>c</sup>Department of Synthetic Chemistry and Biological Chemistry, Graduate School of Engineering, Kyoto University, Katsura, Nishikyo-ku, Kyoto 615-8510, Japan

## **Table of Contents**

|                                                 |        |
|-------------------------------------------------|--------|
| <b>1. Materials</b>                             | S2     |
| <b>2. Measurements</b>                          | S2     |
| <b>3. Activation of Solid of Pillar[6]arene</b> | S2-S4  |
| <b>4. Aromatic Vapor Uptake Experiments</b>     | S4-S12 |
| <b>5. Reference</b>                             | S13    |

## 1. Materials

All solvents and reagents were used as supplied. Pillar[6]arene containing one benzoquinone unit (**3**) was synthesized according to the previous paper.<sup>S1</sup>

## 2. Measurements

The <sup>1</sup>H NMR spectra were recorded at 500 MHz with a JEOL-ECA500 spectrometer. Powder XRD patterns were obtained on Smart Lab (Rigaku) with CuK $\alpha$  radiation (tube voltage, 40 kV, tube current, 20 mA). Diffuse reflectance spectra were recorded with a JASCO V-670 spectrometer. Differential scanning calorimetry (DSC) was performed using a PerkinElmer Jade DSC calorimeter equipped with an Intracooler II under a flow of dry nitrogen and with a heating rate of 10 °C/min. The FT-IR spectra were obtained using a JASCO FT-IR460 plus infrared spectrometer.

## 3. Activation of Solid of Pillar[6]arene **3**

Pillar[6]arene **3** was dissolved in dichloromethane, and then the evaporation of dichloromethane afforded solid **3**. Drying solid **3** at 80 °C under reduced pressure for 24 h was sufficient to de-solvate all dichloromethane molecules and afforded activated solids of **3**. Removing dichloromethane was confirmed by <sup>1</sup>H NMR measurement (**Fig. S1**). No proton signals from dichloromethane indicate complete activation of solid **3**.

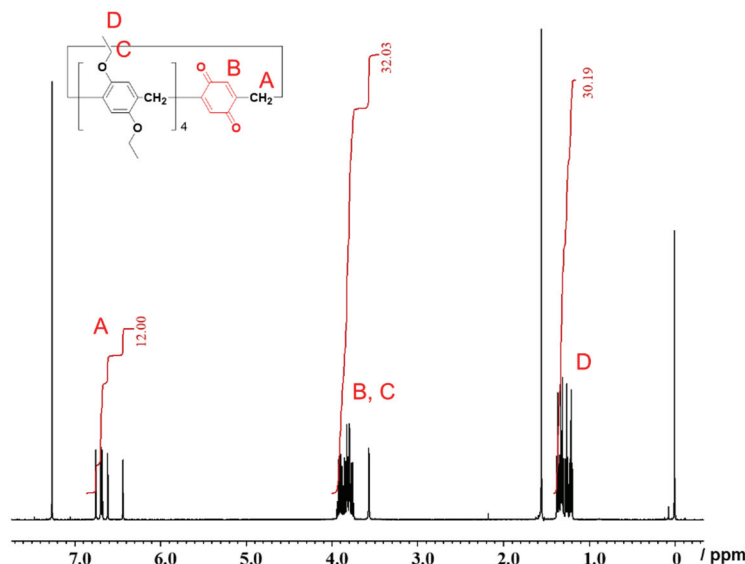

**Fig. S1** <sup>1</sup>H NMR spectrum (CDCl<sub>3</sub>, 25 °C) of activated solid **3**. No signals of solvents in the spectrum indicate complete activation.

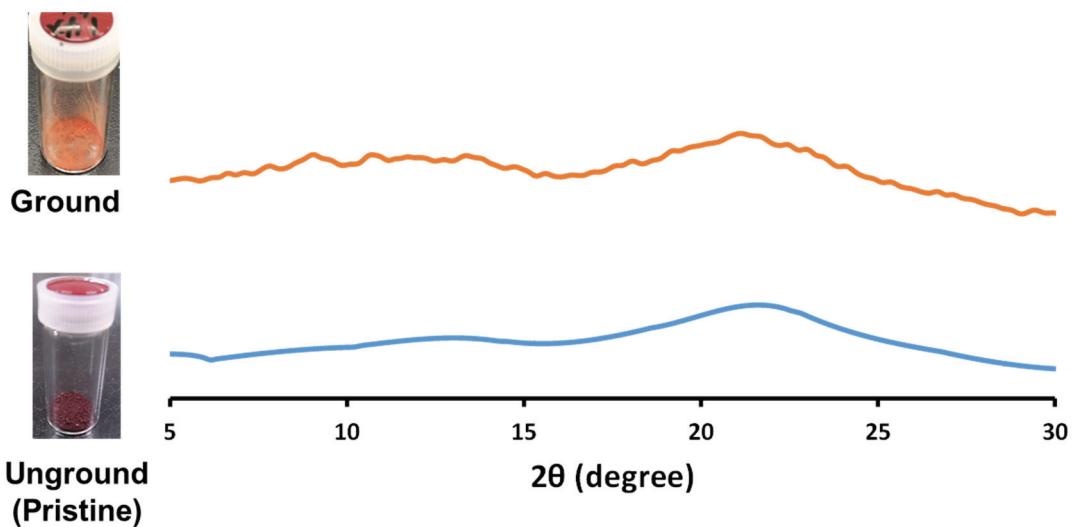

**Fig. S2** PXR D patterns of activated solids **3** with and without grinding.

Both solids **3** with and without grinding were amorphous, indicating that crystal transformation is not trigger to induce the mechanochromism.

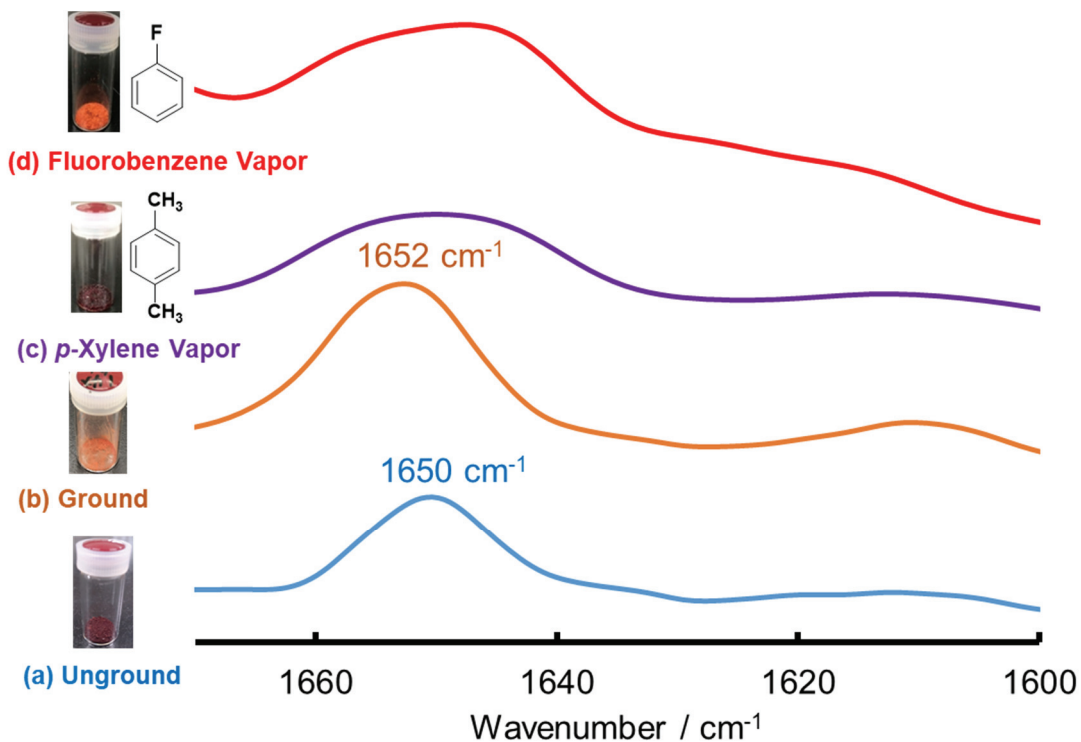

**Fig. S3** FT-IR spectra, Ground (b) and unground activated solids **3** (a) before vapor exposure. Unground solids **3** after exposure to (c) *p*-xylene and (d) fluorobenzene vapors.

After grinding, the peak derived from C=O stretching was shifted from 1650 to 1652  $\text{cm}^{-1}$ , indicating the CT interaction change between benzoquinone and 1,4-diethoxybenzene moieties by grinding. After uptake of these guest vapors, C=O stretching were broadening, indicating that the guest vapor uptake induced different CT interaction.

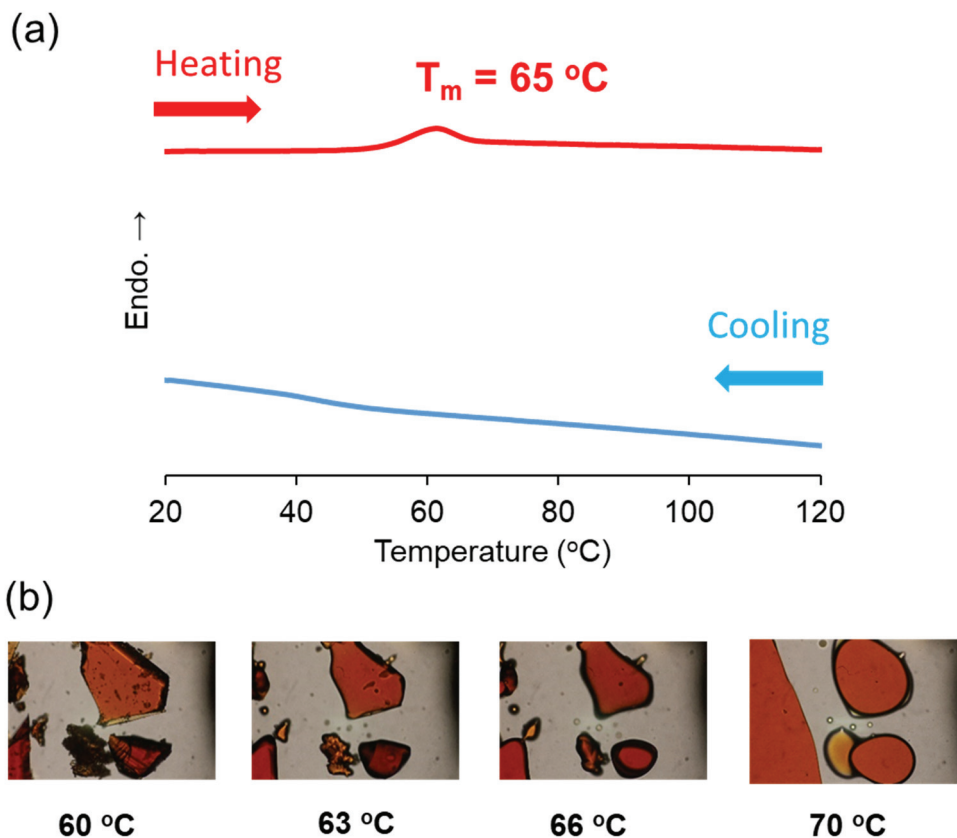

**Fig. S4** (a) DSC curves and of activated solid **3**. (b) Photographs of optical microscope of solid **3** at 60, 63, 66 and 70  $^\circ\text{C}$ .

#### 4. Aromatic Vapor Uptake Experiments

An open 5 mL vial containing 20 mg of activated solids of **3** with and without grinding was placed in a sealed 50 mL vial containing 5 mL of each Aromatic guest solution. Activated solids of **3** were exposed under saturated vapor pressure in the closed vessel at 25  $^\circ\text{C}$ . Uptake of aromatic vapor by solid **3** was monitored by  $^1\text{H}$  NMR by completely dissolving the solids in  $\text{CDCl}_3$  (**Figs. S5-S10**). Color change was investigated by diffuse reflectance spectroscopy (**Fig. S11**). The assembled structures were investigated by PXRD measurements (**Fig. S12**).

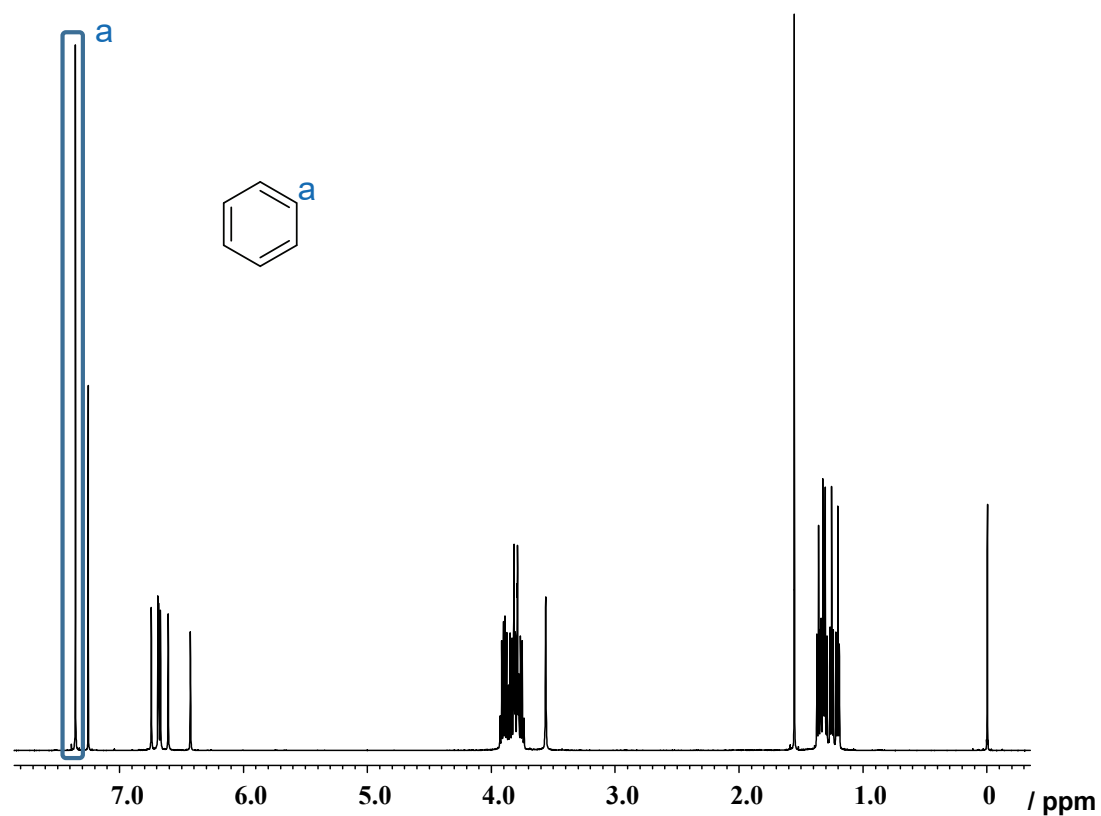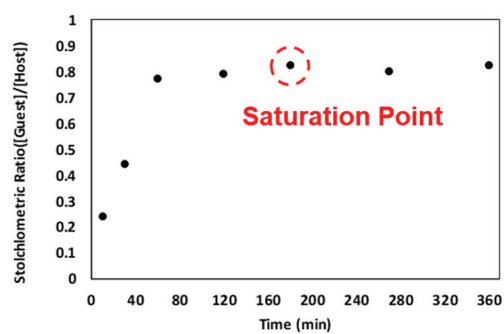

| Time (minutes) | [Guest] / [Host] |
|----------------|------------------|
| 10             | 0.24             |
| 30             | 0.44             |
| 60             | 0.77             |
| 120            | 0.79             |
| 180            | 0.82             |
| 270            | 0.8              |
| 360            | 0.82             |

**Fig. S5**  $^1\text{H}$  NMR spectrum (25 °C,  $\text{CDCl}_3$ ) of crystals of **3** after exposing to benzene vapor for 3 h. The stoichiometry was determined by monitoring integration ratio between proton signals from phenyl proton of benzene and phenyl moiety of **3**.

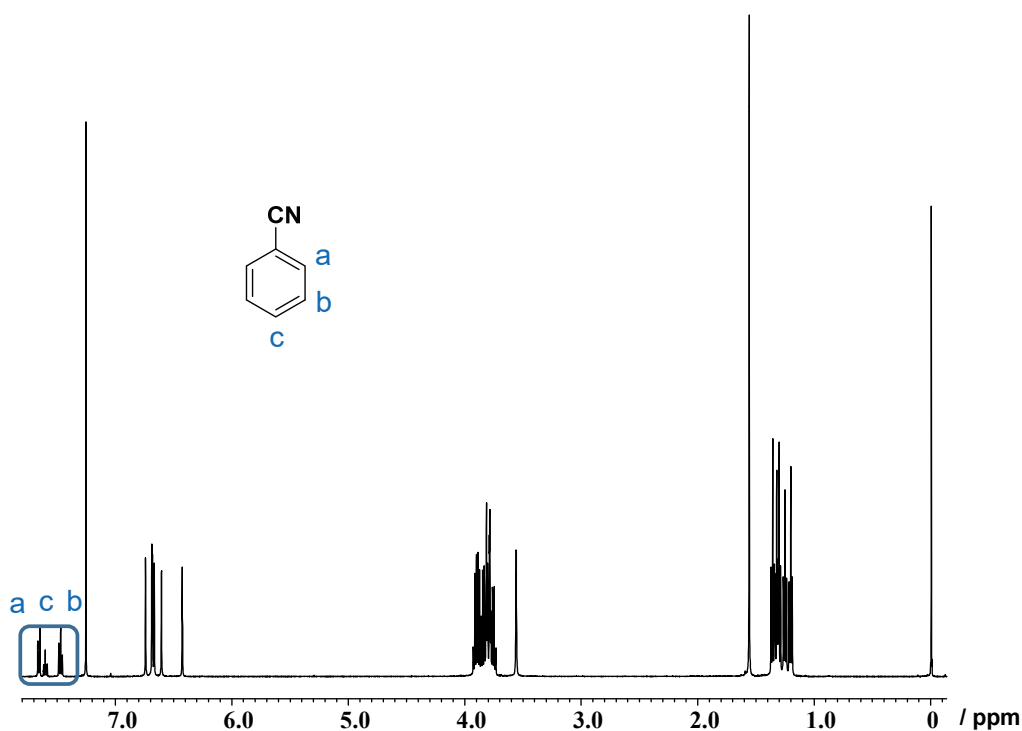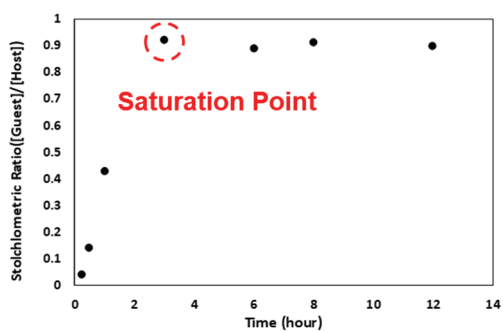

| Time (hours) | [Guest] / [Host] |
|--------------|------------------|
| 0.25         | 0.04             |
| 0.5          | 0.14             |
| 1            | 0.43             |
| 3            | 0.92             |
| 6            | 0.89             |
| 8            | 0.91             |
| 12           | 0.90             |

**Fig. S6**  $^1\text{H}$  NMR spectrum (25  $^\circ\text{C}$ ,  $\text{CDCl}_3$ ) of crystals of **3** after exposing to cyanobenzene vapor for 3 h. The stoichiometry was determined by monitoring integration ratio between proton signals from phenyl proton of cyanobenzene and phenyl moiety of **3**.

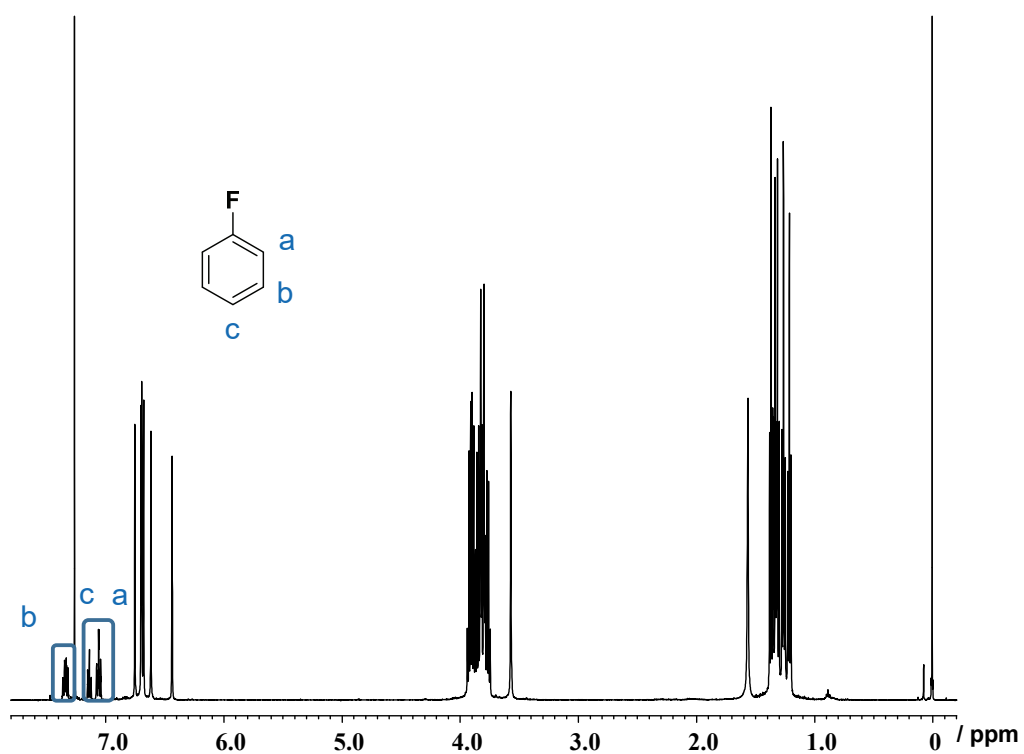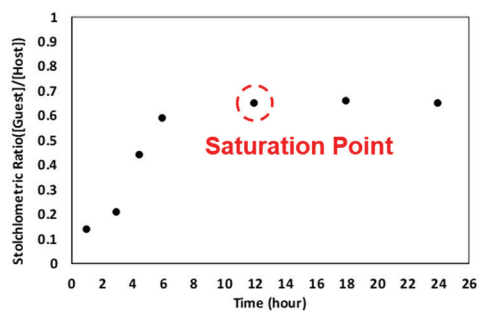

| Time (hours) | [Guest] / [Host] |
|--------------|------------------|
| 1            | 0.14             |
| 3            | 0.21             |
| 4.5          | 0.44             |
| 6            | 0.59             |
| 12           | 0.65             |
| 18           | 0.66             |
| 24           | 0.65             |

**Fig. S7**  $^1\text{H}$  NMR spectrum (25 °C,  $\text{CDCl}_3$ ) of crystals of **3** after exposing to fluorobenzene vapor for 12 h. The stoichiometry was determined by monitoring integration ratio between proton signals from phenyl proton of fluorobenzene and phenyl moiety of **3**.

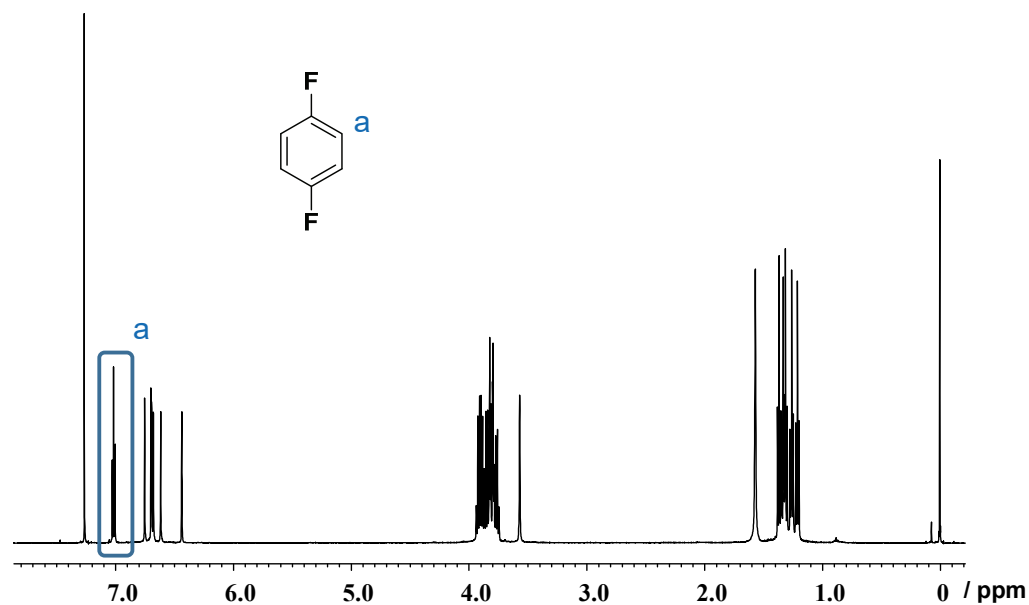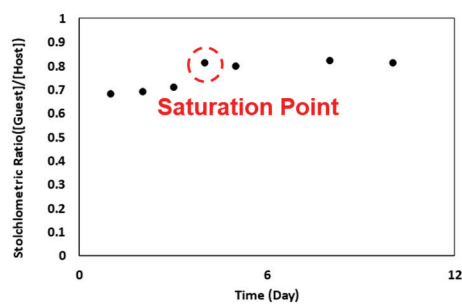

| Time (days) | [Guest] / [Host] |
|-------------|------------------|
| 1           | 0.68             |
| 2           | 0.69             |
| 3           | 0.71             |
| 4           | 0.81             |
| 5           | 0.80             |
| 8           | 0.82             |
| 10          | 0.81             |

**Fig. S8**  $^1\text{H}$  NMR spectrum (25  $^\circ\text{C}$ ,  $\text{CDCl}_3$ ) of crystals of **3** after exposing to *p*-difluorobenzene vapor for 4 days. The stoichiometry was determined by monitoring integration ratio between proton signals from phenyl proton of *p*-difluorobenzene and phenyl moiety of **3**.



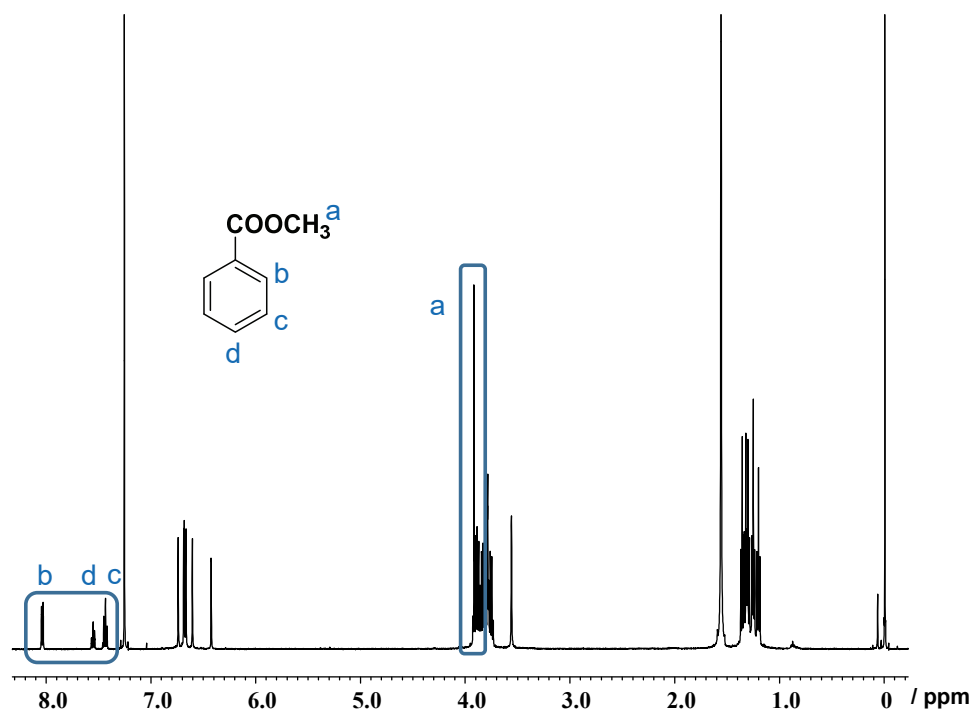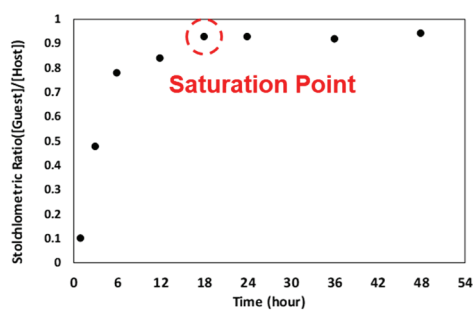

| Time (hours) | [Guest] / [Host] |
|--------------|------------------|
| 1            | 0.10             |
| 3            | 0.48             |
| 6            | 0.78             |
| 12           | 0.84             |
| 18           | 0.93             |
| 24           | 0.93             |
| 36           | 0.92             |
| 48           | 0.94             |

**Fig. S9**  $^1\text{H}$  NMR spectrum (25  $^\circ\text{C}$ ,  $\text{CDCl}_3$ ) of crystals of **3** after exposing to methyl benzoate vapor for 18 h. The stoichiometry was determined by monitoring integration ratio between proton signals from phenyl proton of methyl benzoate and phenyl moiety of **3**.

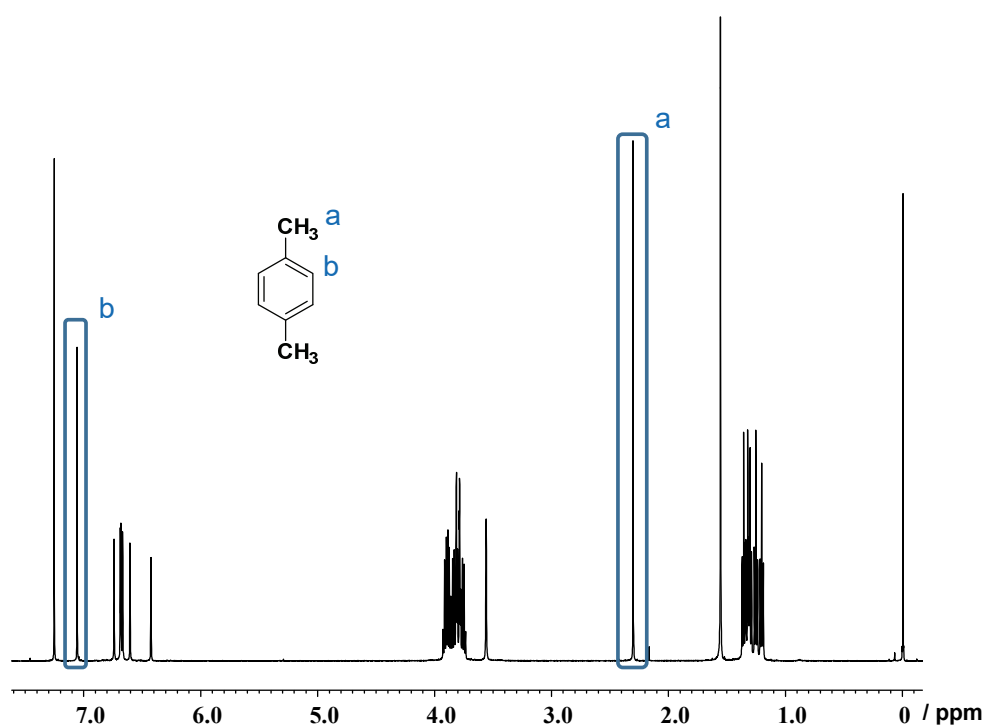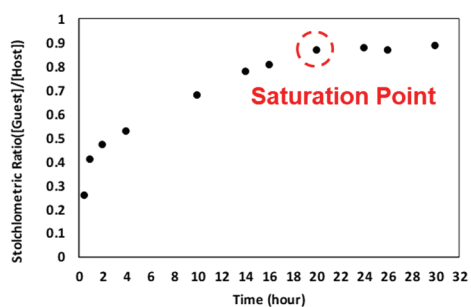

| Time (hours) | [Guest] / [Host] |
|--------------|------------------|
| 0.5          | 0.26             |
| 1            | 0.41             |
| 2            | 0.47             |
| 4            | 0.53             |
| 10           | 0.68             |
| 14           | 0.78             |
| 16           | 0.81             |
| 20           | 0.87             |
| 24           | 0.88             |
| 26           | 0.87             |
| 30           | 0.89             |

**Fig. S10**  $^1\text{H}$  NMR spectrum (25  $^\circ\text{C}$ ,  $\text{CDCl}_3$ ) of crystals of **3** after exposing to *p*-xylene vapor for 20 h. The stoichiometry was determined by monitoring integration ratio between proton signals from phenyl proton of *p*-xylene and phenyl moiety of **3**.

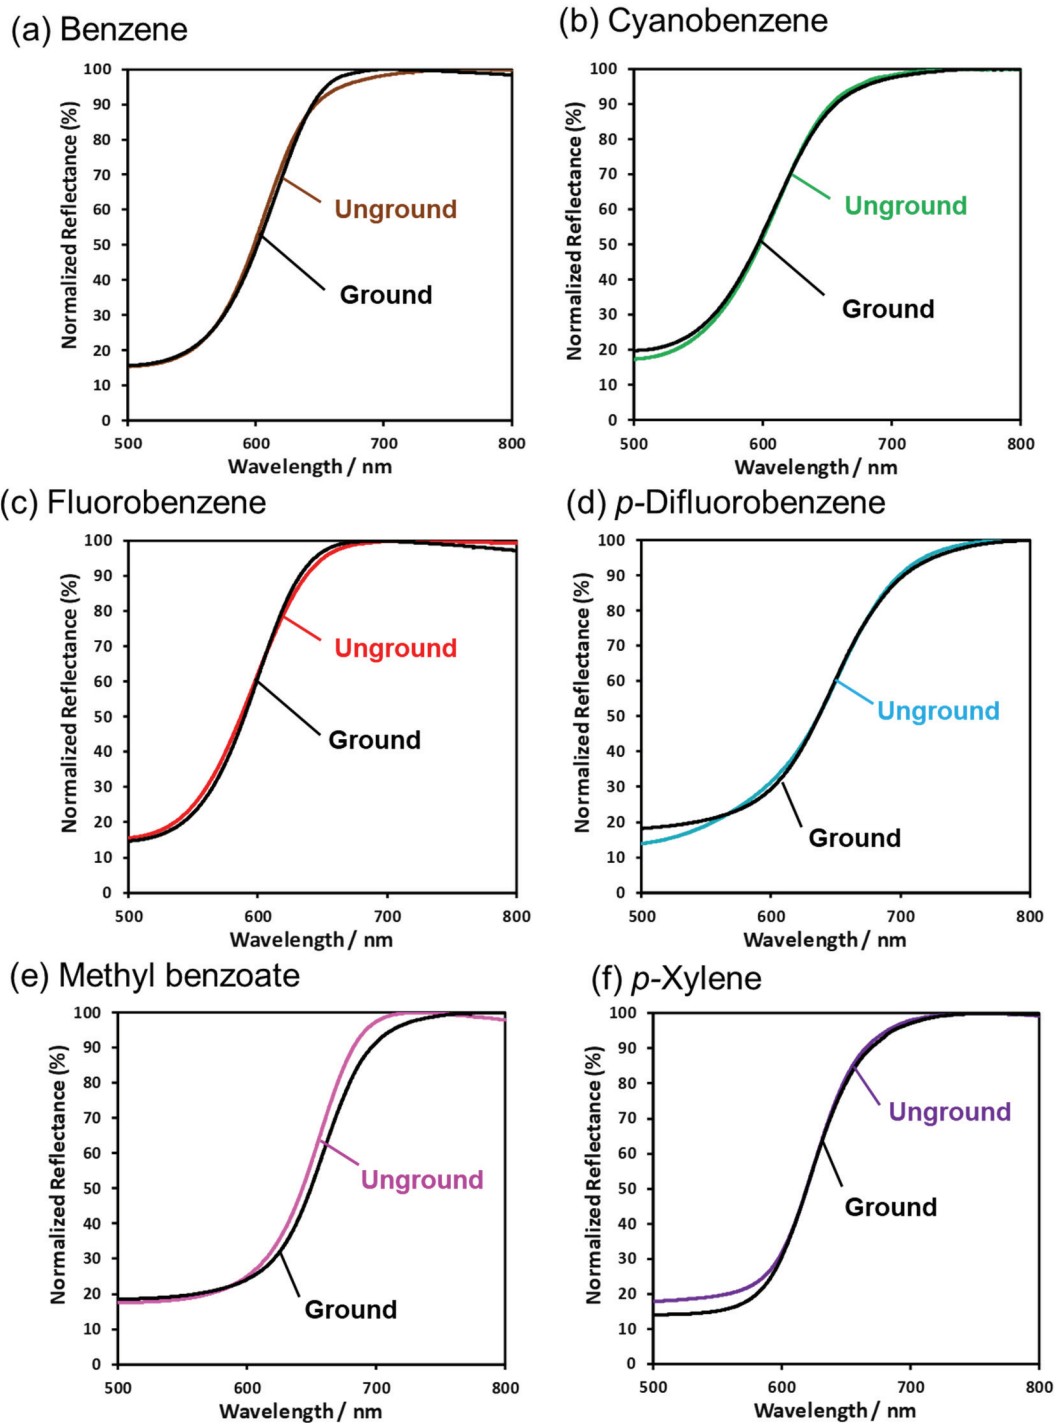

**Fig. S11** Diffuse reflection spectra of solids **3** with and without grinding after exposing to (a) benzene, (b) cyanobenzene, (c) fluorobenzene, (d) *p*-difluorobenzene, (e) methyl benzoate and (f) *p*-xylene vapors.

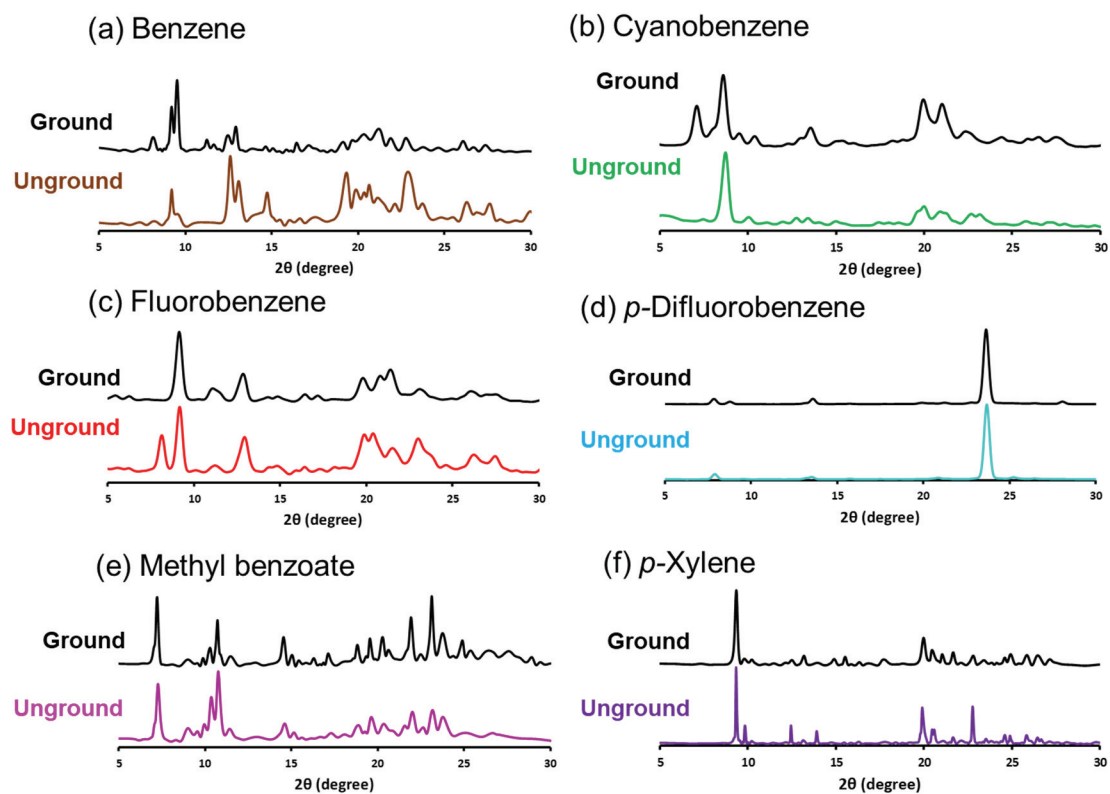

**Fig. S12** PXRD patterns of solids **3** with and without grinding after exposing to (a) benzene, (b) cyanobenzene, (c) fluorobenzene, (d) *p*-difluorobenzene, (e) methyl benzoate and (f) *p*-xylene vapors.

## 5. Reference

S1) T. Ogoshi, D. Yamafuji, D. Kotera, T. Aoki, S. Fujinami and T. Yamagishi, *J. Org. Chem.*, 2012, **77**, 11146.
